# Supplementary material
Source: PubMed Central journal article supplement (PMC8435354)

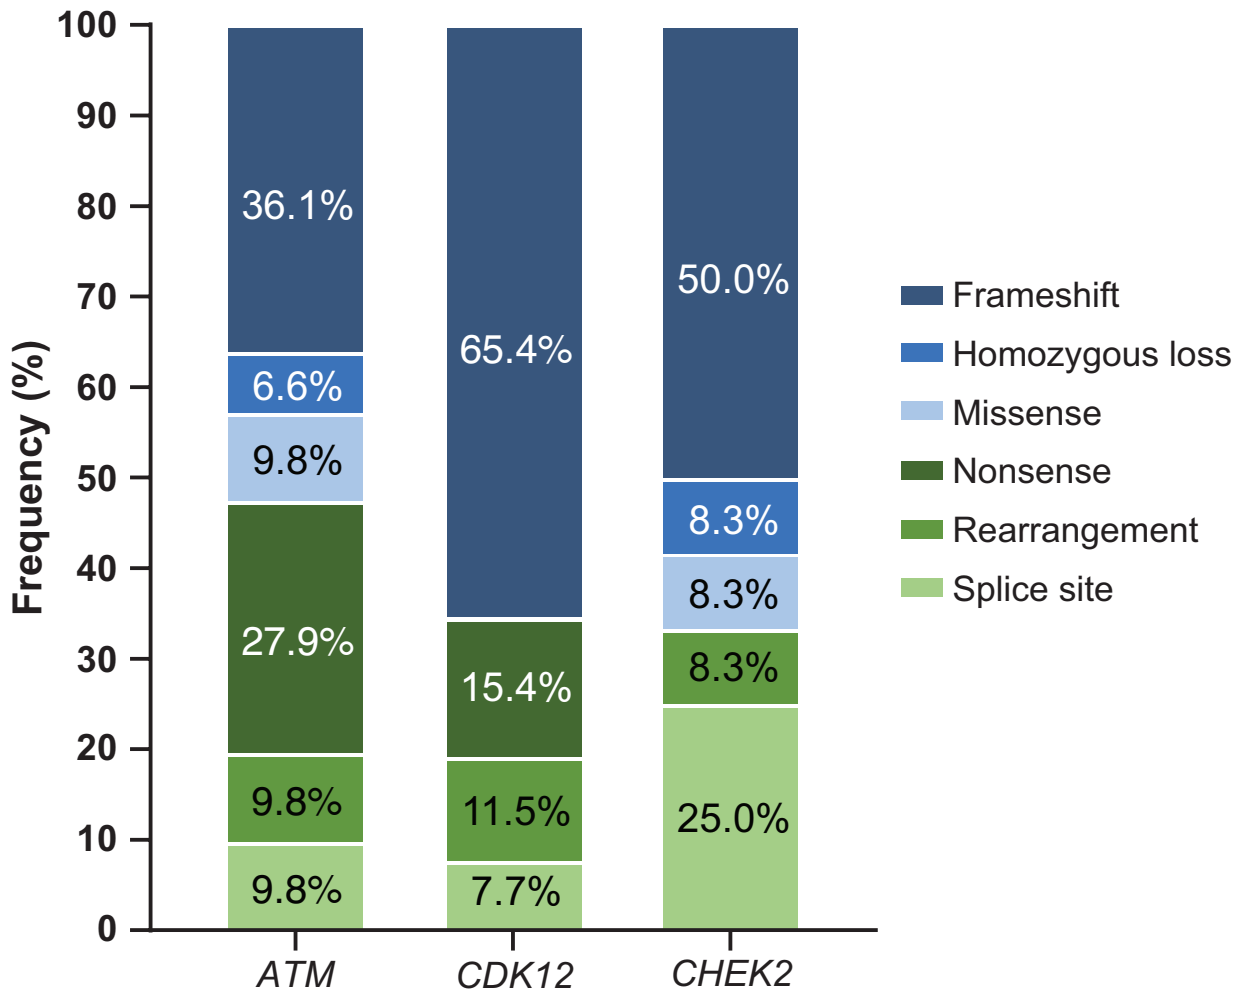

Supplement: NIHMS1735834-supplement-Supplementary_Figure_S1.pdf [file NIHMS1735834-supplement-Supplementary_Figure_S1.pdf]
